# Supplementary material
Source: Springer Nature journal article supplement (https://www.springermedizin.de/resource/supplementary/12939_2013_440_MOESM3_ESM.pdf/9551168)

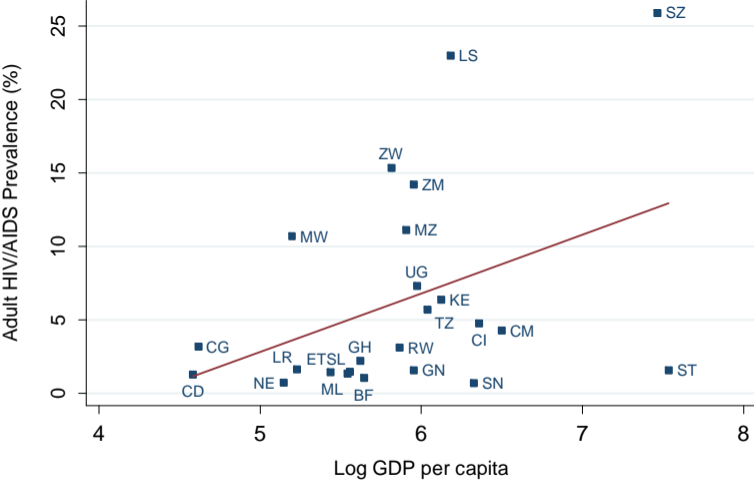

■ Total HIV/AIDS Prevalence — Log Linear Fitted values

Supplement: MOESM3 [file 9551168]
